# Supplementary material for: Transcriptionally imprinted glycomic signatures of acute myeloid leukemia
Source: Springer Nature journal article supplement (doi:10.1186/s13578-023-00981-0), 2023-02-14
Supplement: MOESM1 [file 13578_2023_981_MOESM1_ESM.pdf]

## Supporting Information

### Transcriptionally imprinted glycomic signatures of acute myeloid leukemia

Constantin Blöchl<sup>a,#</sup>, Di Wang<sup>a,#</sup>, Oleg A. Mayboroda<sup>a</sup>, Guinevere S.M. Lageveen-Kammeijer<sup>a</sup>, and Manfred Wuhrer<sup>a,\*</sup>

*# These authors contributed equally.*

<sup>a</sup> Leiden University Medical Center, Center for Proteomics and Metabolomics, Albinusdreef 2, 2333 ZA Leiden, The Netherlands

\*Corresponding author: [m.wuhrer@lumc.nl](mailto:m.wuhrer@lumc.nl), tel: +31(0)71 526 6989

#### TABLE OF CONTENTS

Additional file 1: Figure S1. GST and TF expression across FAB subtypes. .... page 2

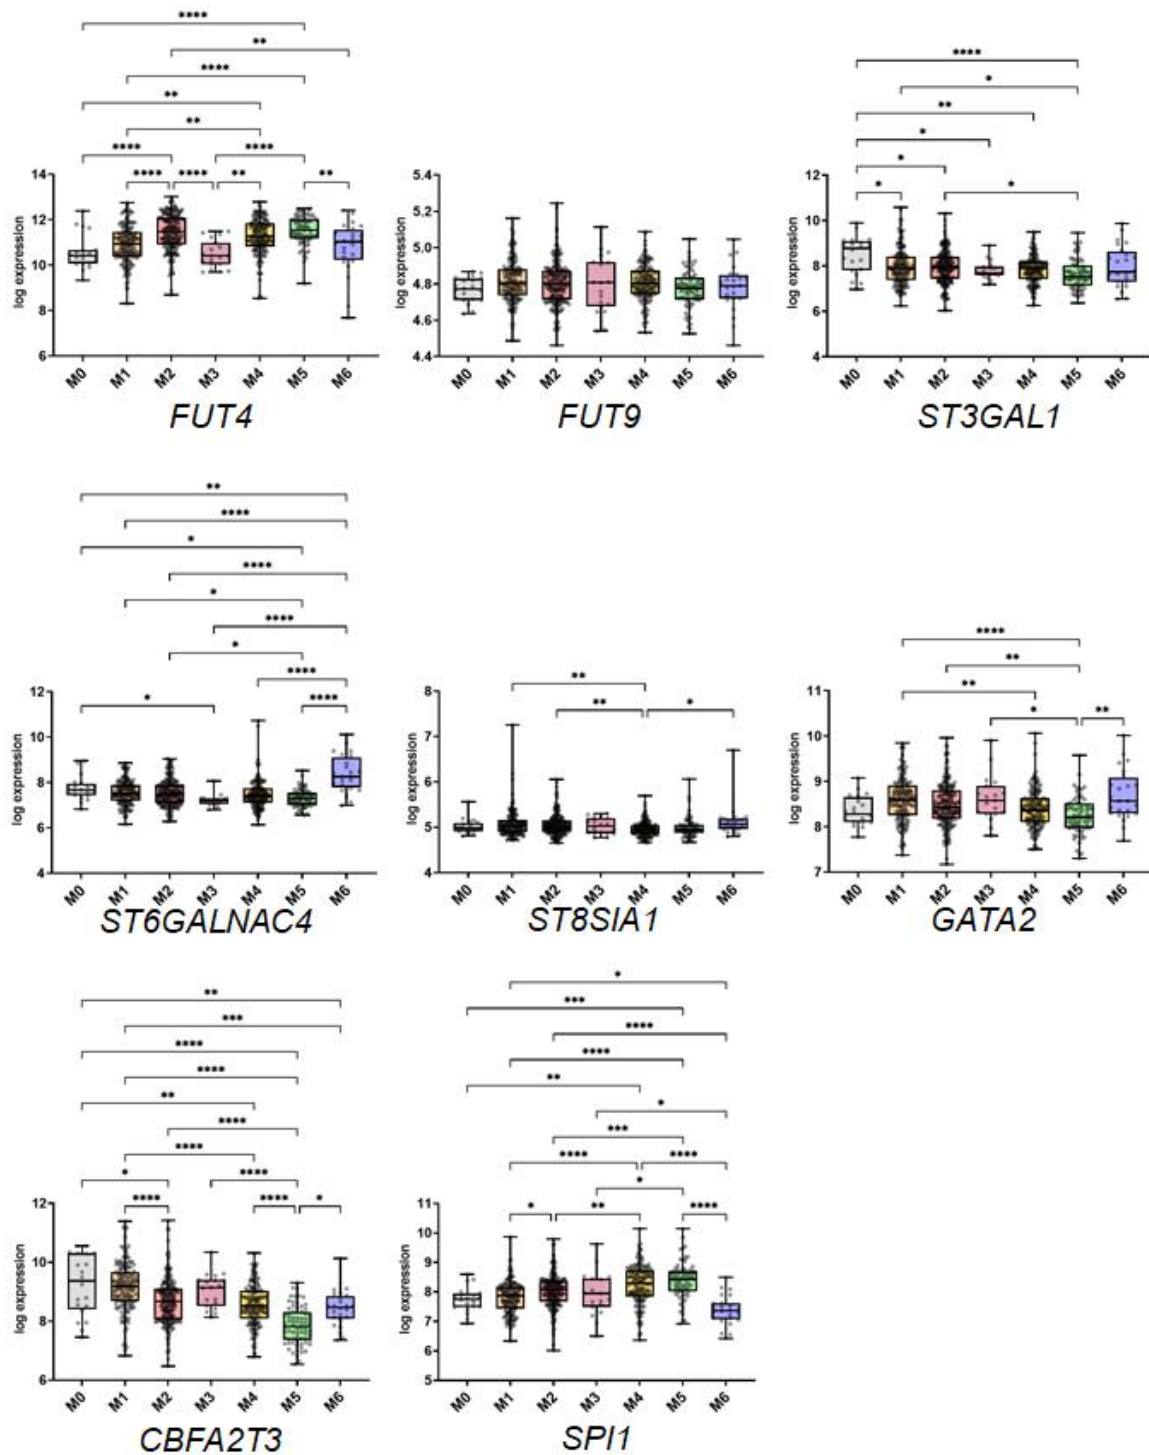

**Additional file 1: Figure S1. GST and TF expression across FAB subtypes.** Expression of selected GSTs and TFs was explored in primary AML blasts. Significances were assessed by one-way ANOVA followed by a Tukey post-hoc test. Significant values are marked with \* ( $p \leq 0.05$ ), \*\* ( $p \leq 0.01$ ), \*\*\* ( $p \leq 0.001$ ), and \*\*\*\* ( $p \leq 0.0001$ ).
